# Supplementary material
Source: PubMed Central journal article supplement (PMC3396141)
Supplement: Supp_Data.pdf [file Supp_Data.pdf]

## Supplementary Data

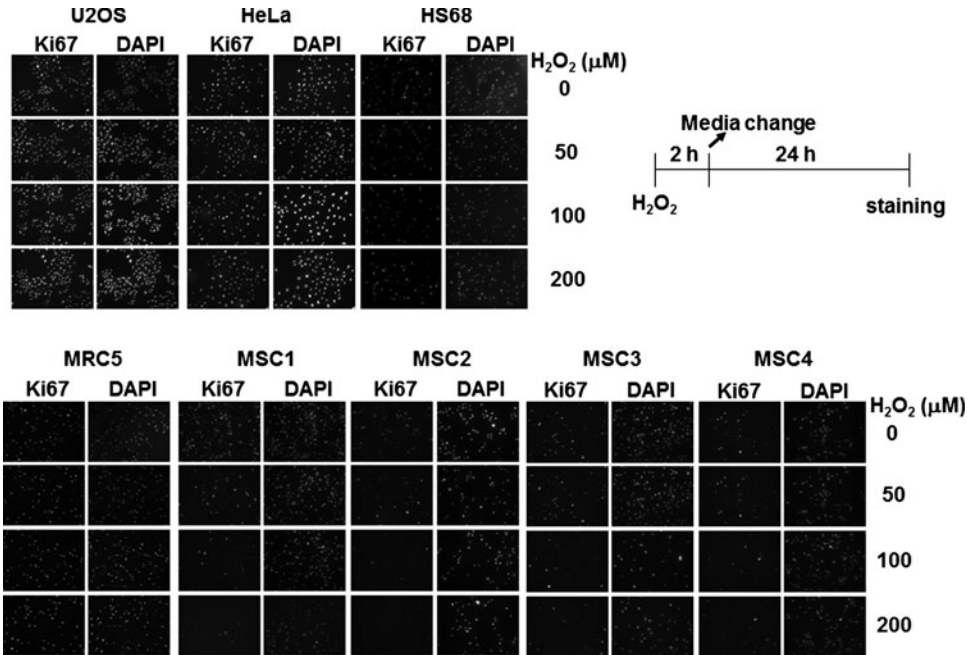

**SUPPLEMENTARY FIG. S1.** Hydrogen peroxide inhibits proliferation of hUCB-MSCs. Cells treated with hydrogen peroxide, as described in Fig. 1, were immunostained with anti-Ki-67 antibody. DAPI staining was used to visualize the nuclei. Cells were imaged under a fluorescent microscope. MSCs, mesenchymal stem cells; hUCB-MSCs, human umbilical cord blood-derived MSCs.

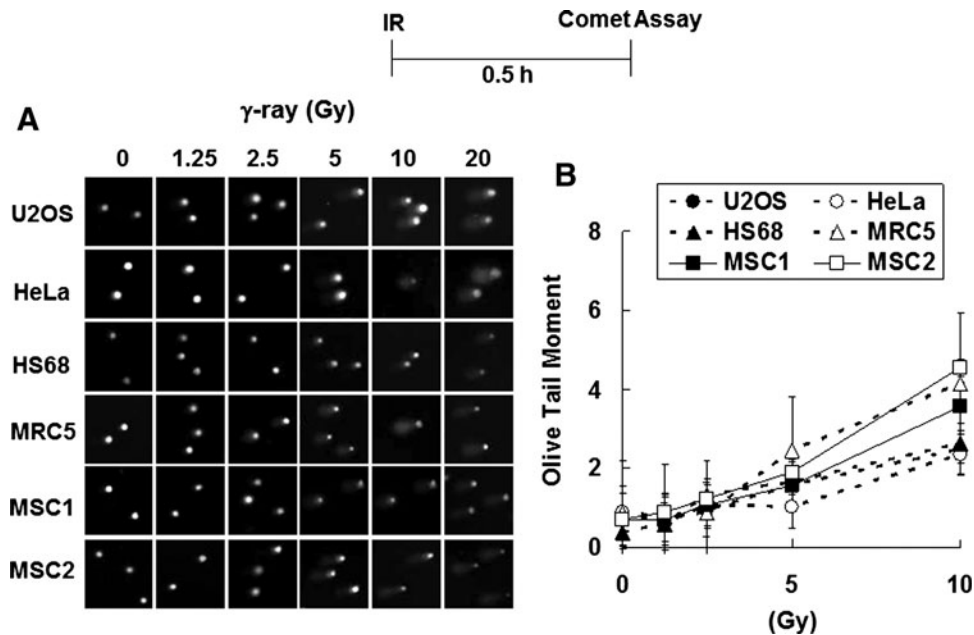

**SUPPLEMENTARY FIG. S2.** DNA damage generated by ionizing radiation. (A) Cells irradiated with  $\gamma$ -rays were analyzed using the comet assay immediately after irradiation. (B) Olive tail moments were measured as described in Fig. 2. *P* value was  $>0.05$ .

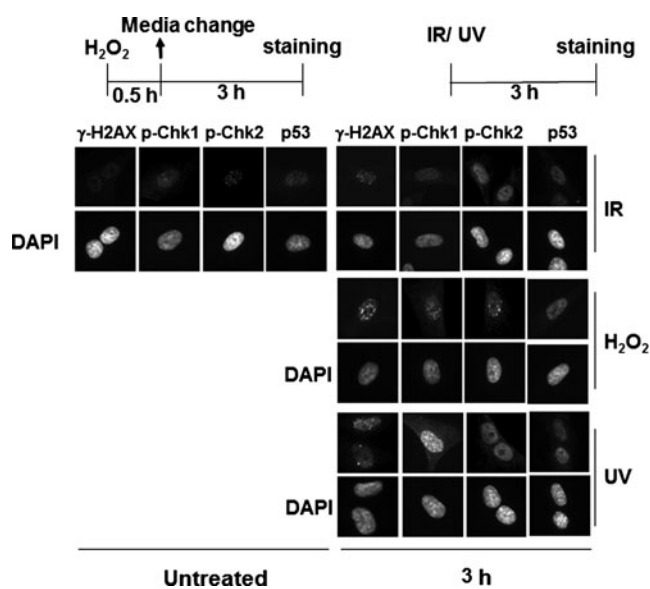

**SUPPLEMENTARY FIG. S3.** DNA damage signaling proteins activated in hUCB-MSCs. MSC1 cells were treated with 10 Gy of  $\gamma$ -radiation, 200  $\mu$ M of hydrogen peroxide, or 10 J/m<sup>2</sup> of ultraviolet radiation. Three hours after the treatment, the cells were immunostained with relevant antibodies, as described in Materials and Methods. Nuclei were visualized by DAPI staining.

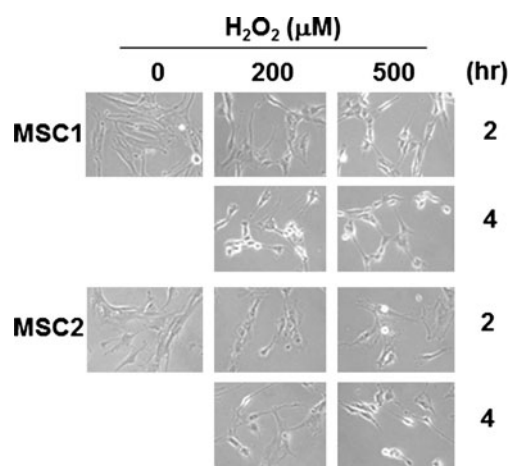

**SUPPLEMENTARY FIG. S4.** Hydrogen peroxide induces cell death in hUCB-MSCs. Cells treated with the indicated concentrations of hydrogen peroxide for 2 or 4 h were imaged using phase-contrast microscopy.

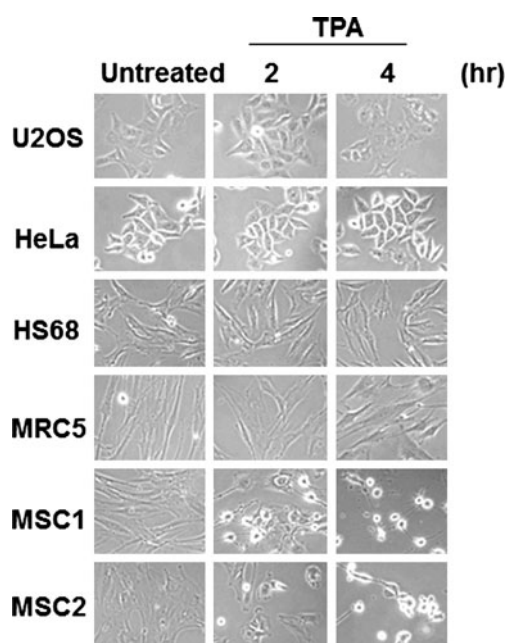

**SUPPLEMENTARY FIG. S5.** TPA causes cell death in hUCB-MSCs. Cells treated with 10  $\mu$ M of TPA for 2 or 4 h were imaged using phase-contrast microscopy. TPA, phorbol-12-myristate-13-acetate.

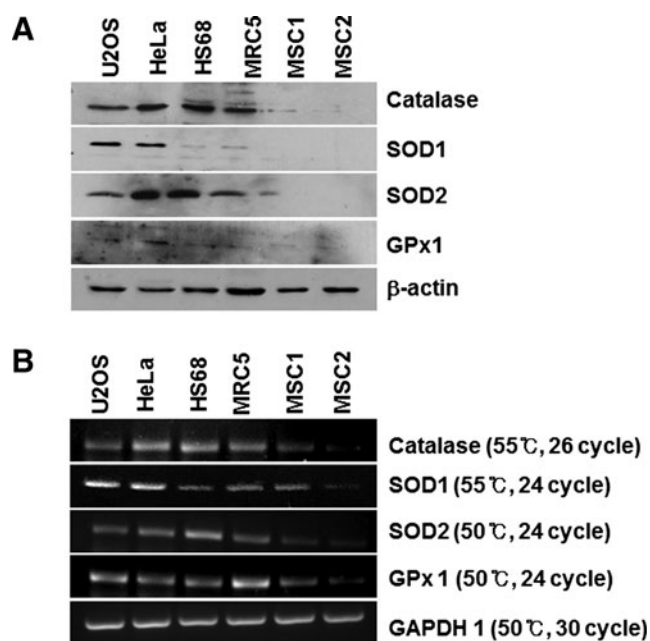

**SUPPLEMENTARY FIG. S6.** Low antioxidant protein levels in hUCB-MSCs are due to low gene expression levels. Immunoblotting with the relevant antibodies (**A**) and RT-PCR (**B**) were performed as described in Fig. 5 and Materials and Methods. SOD1, superoxide dismutase 1; SOD2, superoxide dismutase 2; GPx1, glutathione peroxidase 1; RT-PCR, reverse transcriptase-polymerase chain reaction.

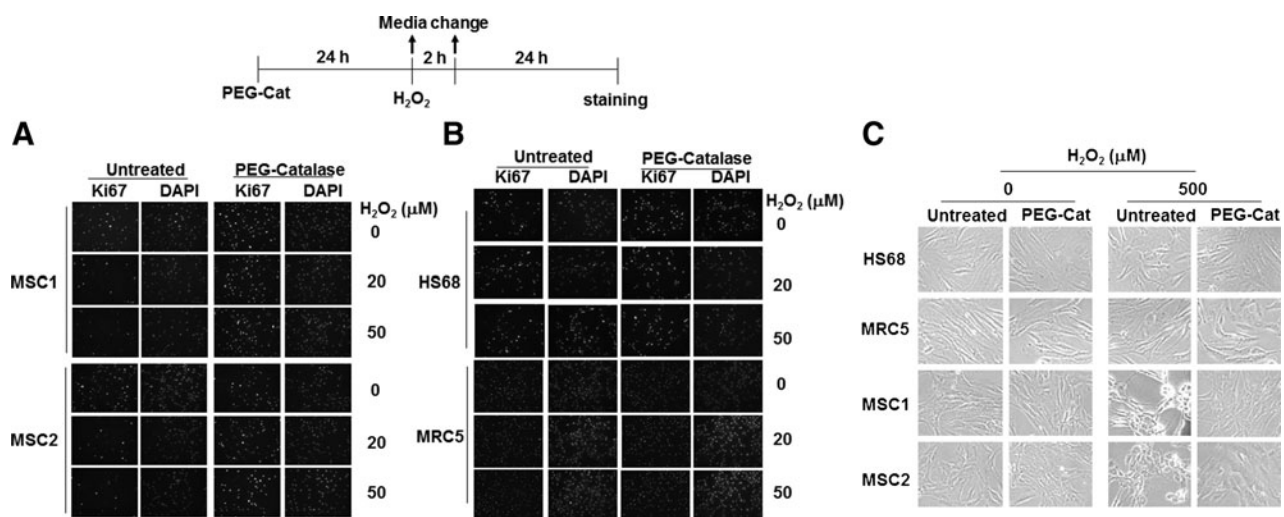

**SUPPLEMENTARY FIG. S7.** Exogenously added antioxidant increases resistance of hUCB-MSCs to oxidative stress. **(A, B)** hUCB-MSCs (MSC1 and MSC2) and human fibroblast cells (MRC5 and HS68) were preincubated with 200 U/mL of PEG-catalase, washed, and then incubated in fresh medium containing the indicated concentration of hydrogen peroxide for 2 h. Next, the washed cells were grown in fresh medium for 24 h and then immunostained with anti-Ki-67 antibody. **(C)** The cells were treated as described in Fig. 6C and imaged using phase-contrast microscopy. PEG-catalase, polyethylene glycol-conjugated catalase; PEG-Cat, PEG-catalase.

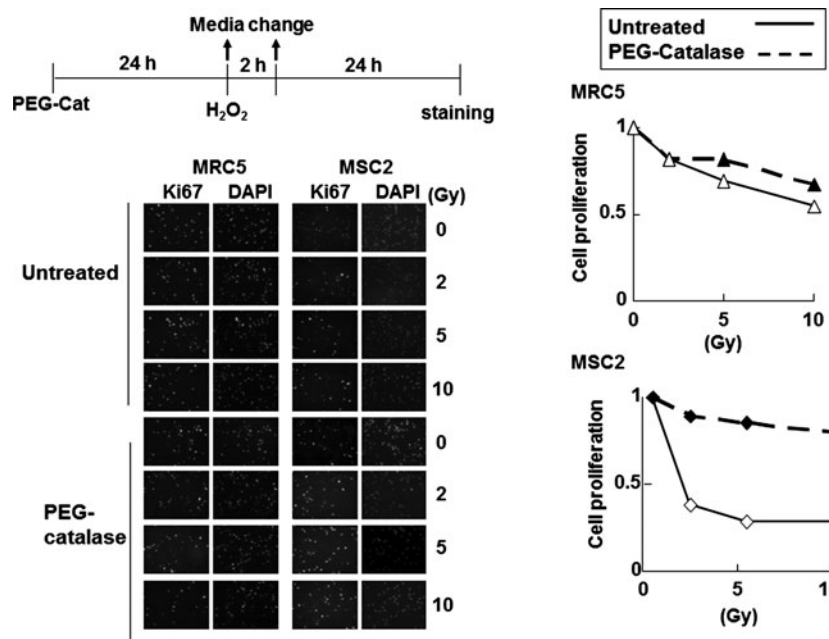

**SUPPLEMENTARY FIG. S8.** Increased antioxidant activity confers resistance to ionizing radiation in hUCB-MSCs. Human fibroblast cells (MRC5) and hUCB-MSCs (MSC2) pretreated with 200 U/mL of PEG-catalase were irradiated with the indicated doses of ionizing radiation. One day after irradiation, the cells were immunostained using the Ki-67 antibody.
